# Supplementary material for: Identification of proteins binding coding and non-coding human RNAs using protein microarrays
Source: PubMed Central journal article supplement (PMC3562209; doi:10.1186/1471-2164-13-633), 2012-11-16

# Figure S1

**A**

## Modified Gentel SIMplex 16 Device

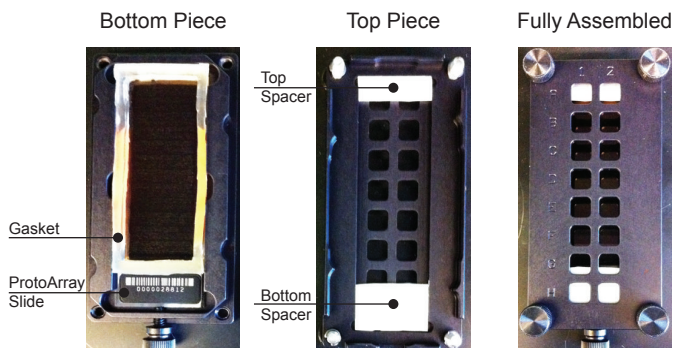

## Gasket

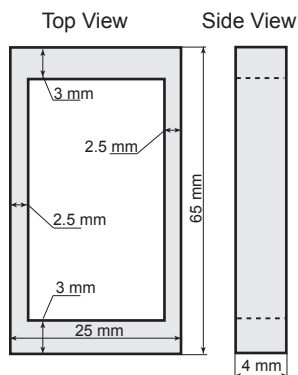

## Spacer

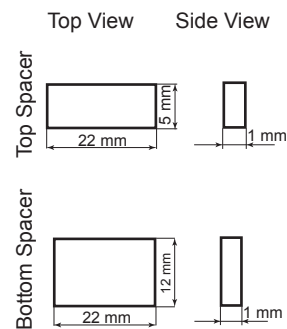

**B**

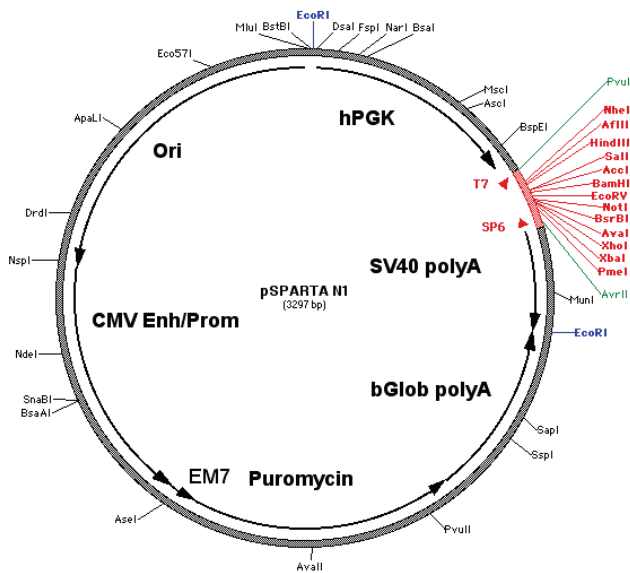

**C**

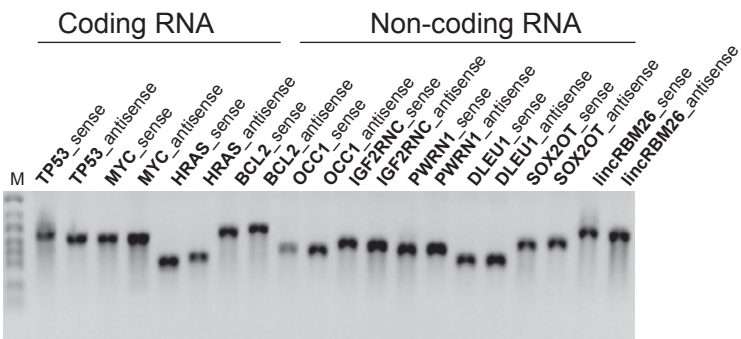

**D**

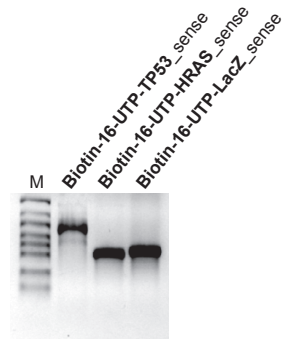

Supplement: 1471-2164-13-633-S1.pdf [file 1471-2164-13-633-S1.pdf]
